# Supplementary material for: Amidoxime Polymers for Uranium Adsorption: Influence of Comonomers and Temperature
Source: MDPI journal article supplement (doi:10.3390/ma10111268), 2017-11-04
Supplement: s1 [file s1]

**Supplementary Materials: Amidoxime Polymers for Uranium Adsorption: Influence of Comonomers and Temperature**

**Austin P. Ladshaw, Alex I. Wiechert, Sadananda Das, Sotira Yiacoumi, and Costas Tsouris**

*Adsorption Model Details*

The basics of the model are broken up into four parts: (i) aqueous reactions, (ii) adsorption reactions, (iii) mass balances, and (iv) electroneutrality. Aqueous reactions are represented in the model as shown in equations (S1) and (S2). In this representation, *υ* is the stoichiometric constant for each species involved in the reaction, *γaq* is the aqueous activity coefficient of those species, [*i*] is the aqueous molar concentration of the *i*th species, {*i*} is the aqueous activity of the *i*th species, and *K* is the equilibrium constant for that reaction. The aqueous activity coefficients can be determined using the Davies or Debye-Hückel equations or similar models.S1

| . | (S1) |
| --- | --- |
|  | (S2) |

Mass balances in the model are formed as the sums of the molar contributions and concentrations of each species in the system that contributes to a particular mass group. For instance, total carbonate in the system would be based on how much CO32− was added to the system in total, and must equal the concentrations of each species containing CO32− groups in their respective molar contributions (i.e., UO2(CO3)34− would contribute 3 moles of CO32− to the carbonate mass balance). In addition, our model accounts for the mass removed from the aqueous phase via adsorption as shown in equation (S3) below:S2

| . | (S3) |
| --- | --- |

where *CT* is the total concentration of a particular species group, *ma* is the total mass of an adsorbent in the system, *V* is the total volume of the system, *δi* is the molar contribution of species *i* to the total concentration, and *qi* is the adsorbed molar concentration of species *i*.

The pH of the system is determined using the condition of electroneutrality in the aqueous phase (equation (S4)). This condition looks at the ionic charge (*n*) of each species in solution and requires that the total concentrations of positive and negative ions cancel out each other, such that there is no net charge in the system.S1,S2 Alternatively, our model can consider the system at a constant pH by applying an equality constraint on the activity of the protons, {H+}, in solution (equation (S5)).

| . | (S4) |
| --- | --- |
|  | (S5) |

*Adsorption Reactions*

To represent the adsorption reactions that occur on the adsorbent surface, consider the diagram in Figure S1. In this illustration of the surface phase, there are a number of reactive sites or ligands (semi-circles and triangles) that may bind positive or negative ions in solution (ovals and diamonds) to form new surface species. Additionally, those surface species may become involved in non-bonding interactions with other surface species or other salts in solution, as indicated by the dashed lines in Figure S1. These additional interactions may create non-idealities for surface adsorptionS3 and/or charge neutralization of the adsorbent surface.S4


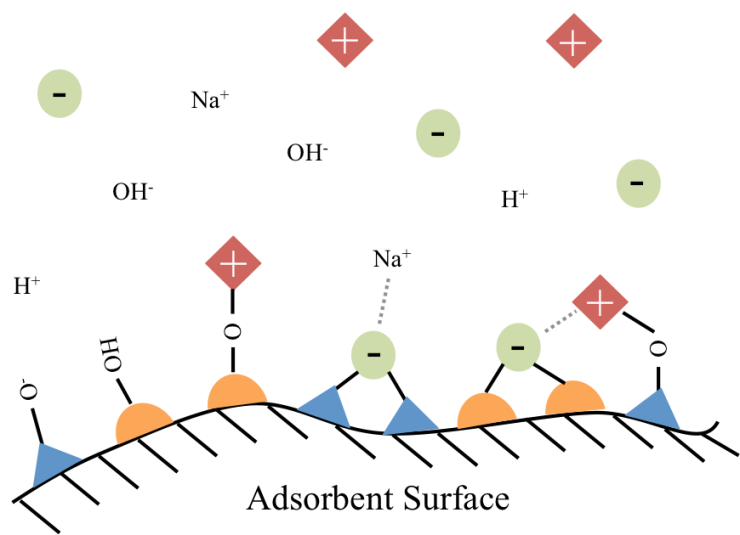


**Figure S1.** Schematic diagram to represent adsorption of ions from bulk solution onto a surface that may be composed of multiple ligands or reactive sites. Bonding reactions are represented by solid lines to the ions (diamonds and/or ovals) and dashed lines represent the non-bonding interactions.

*Surface Charging*

Charging of the adsorbent surface occurs naturally as the ligands bind with ions in solution to form new surface species.S2,S4 The impact of surface charging is accounted for through the Boltzmann factor, which acts as a correction parameter for the binding strength (equation 7 from *Modeling Methods*). This correction term is a function of the elementary electrical charge constant (*e* = 1.6×10-19 C), Boltzmann constant (*kB* = 1.38×10−23 J/K), electrical surface potential (*Ψ*), temperature (*T*), and net charge exchange (*N*), which is itself a function of the ionic charges (*n*) of the aqueous species involved in the reaction (equations (S6a) and (S6b)).

| . | (S6a) |
| --- | --- |
|  | (S6b) |

Determination of the electrical surface potential (*Ψ*) can be mathematically complex. Theoretically, the electrical potential varies with the distance from the surface of the adsorbent and the adsorbed ionic charge density at that distance away from the surface.S2,S5 This can be represented by the Poisson equation below:

| . | (S7) |
| --- | --- |

where *ε* is the dielectric constant of the medium, *ε* is the permittivity of free space, *ρ* is the volumetric ion charge density, and **r** is a vector representing a location in three-dimensional space.

Finding a solution to equation (S7) for the generalized representation of surface adsorption would require non-linear, numerical integration and add significant complexity to the model. We can simplify the approximation to the electrical potential by assuming the adsorbent surface can be represented by a flat plane and applying the Gouy-Chapman theory to approximate the surface potential at the adsorption interface of the electrical double layer.S2,S4,S6 If this approximation is then coupled with the Grahame model41 for the adsorbent surface charge density, then a simple approximation to the electrical surface potential can be formulated as shown in equation (S8) below:

| . | (S8) |
| --- | --- |

where *I* is the ionic strength in the bulk aqueous phase, *σ* is the total surface charge density for the adsorbent, *F* is Faraday’s constant (96.49 kC/mol), and *A* is the specific area of the adsorbent. Note that the summation over (*i,l*) means to iterate over all adsorbate (*i*) and ligand (*l*) pairs. One of the underlying assumptions of the Grahame model is that the double layer consists of an ideal 1:1 electrolyte ratio.S4 In the generalized model, this may not always be the case, although the majority of ions in solution will be monovalent. Therefore, equation S8 is only an approximation of the electrical surface potential.

*Surface Activity*

In addition to surface charging effects on adsorption, the non-bonding interactions between the various surface species can also have an impact on adsorption of ions from solution. Similar to aqueous species, the activity of surface species can be included in the model through the activity coefficients (i.e., {*q*} = *γsq*). There are several different models available in literature (e.g. Flory-Huggins, Wilson, etc.) to estimate the activity coefficients of the adsorbed species.S3,S7,S8 For this particular application, our model utilizes the universal quasi-chemical (UNIQUAC) model developed by Abrams and Prausnitz.S3

UNIQUAC is a semi-theoretical model of excess Gibbs energy that was derived from a generalization of the Guggenheim model.S3 The total expression for the activity coefficient for the *i*th adsorbate bonded to the *l*th ligand (equation (S9a)) is composed as a sum of an athermal combinatorial average area factor (equation (S9b)) and a thermal residual local area factor (equation (S9c)). Physical interpretations of each factor are as follows: (i) the combinatorial term (*gC*) represents all the spatial configurations of the surface species in the absence of molecular interactions with each other and (ii) the residual term (*gR*) represents added effects of non-bonding, molecular interactions.

| . | (S9a) |
| --- | --- |
|  | (S9b) |
|  | (S9c) |

The UNIQUAC equations are fairly complex and involve many different parameters including average area fraction (*Θ*), average volume fraction (Φ*i,l*), coordination constant (*z* = 10), adsorbate length factor λ), adsorbate area factor (*si,l*), adsorbate volume factor (*ri,l*), the adsorbed mole fraction of the *i*th adsorbate (*yi,l*), and a binary interaction parameter between the *i*th and *j*th adsorbates bound to the *l*th and *m*th ligands, respectively (*τij,lm*). Most of these parameters can be estimated from known information about the adsorbing species.S3,S9

*UNIQUAC Parameters*

Parameters of UNIQUAC include structural information about the adsorbing species, as well as reaction energies for the bonding of the adsorbates with their respective ligands. Shape factors (*si,l* and *ri,l*) for each adsorbed species are determined as a ratio of the van der Waals areas and volumes (*ai,l* and *vi,l*) of the adsorbates to a standard segment area and volume (*Aw* = 2.5 x 109 cm2/mol and *Vw* = 15.17 cm3/mol) defined by Abrams and PrausnitzS3 (equations (S10) and (S11)). The van der Waals areas and volumes themselves can be calculated from the atoms that make up each adsorbate.S9

| . | (S10) |
| --- | --- |
|  | (S11) |

After determining those shape factors, the remaining structural parameters of UNIQUAC are calculated as shown in equations (S12) through (S15).S3 This gives information on the surface mole fractions (*yi,l*), average area fractions (*θ*), volume fractions (Φ*i,l*), and length factors *λ*). Once this information is determined, the only missing parameters from UNIQUAC are the binary interaction terms (*τij,lm*).

| . | (S12) |
| --- | --- |
|  | (S13) |
|  | (S14) |
|  | (S15) |

In the original UNIQUAC model,S3 the binary interaction terms were considered as adjustable parameters that needed to be obtained through optimization with adsorption data. It is possible, however, to provide approximations to those parameters from the binding energies of the individual adsorbing species. This can be accomplished by first considering the expansion of those binary parameters (equation (S16)) into a set of two energy terms: (i) a lateral interaction potential (*uii,ll*) and (ii) a cross-lateral interaction parameter (*uji,ml*).S3,S8

| . | (S16) |
| --- | --- |

The physical meaning of the lateral (*uii,ll*) and cross-lateral (*uji,ml*) interaction parameters can be interpreted as the interaction energy between the *i*th adsorbate with another *i*th adsorbate and the interaction energy between the *i*th adsorbate with the *j*th adsorbate, respectively. Since the *j*th and *i*th adsorbates may be bonded to different ligands, the secondary subscripts of *m* and *l* are used to denote which ligand each is bound to (e.g., in equation S16 above, *j* and *m* are paired and *i* and *l* are paired). The lateral interaction parameter can be calculated from the heat of adsorption (Δ*Hi,l*) and the area factor of the adsorbate (*si,l*) as shown in equation (S17). It is then possible to provide an estimate to the cross-lateral term by taking the geometric average of each lateral interaction parameter (equation (S18)).S3,S8

| . | (S17) |
| --- | --- |
|  | (S18) |

*Aqueous Reactions and Formation Energies*

In total, the adsorption model to simulate the laboratory experiments described in this work involves 35 aqueous species (Table S1) and 28 aqueous reactions (Table S2). This information is coupled with the 12 adsorption reactions and 12 adsorbed uranium species that were discussed in the main body of the work (Table 3 from *Relevant Ligand and Comonomer Reactions*). The culmination of all of these reaction equations, together with the mass balance equations and electroneutrality equations, creates a fully coupled non-linear system of equations that must be solved numerically.

**Table S1.** Summary of formation enthalpies, entropies, and free energy for each aqueous species considered in the model. Note that all energy values are for 25 oC as the reference temperature.S1,S10–S12

| Species | *Hfo* (kJ/mol) | *So* (J/K/mol) | *Gfo* (kJ/mol) |
| --- | --- | --- | --- |
| H2O (*l*) | −285.8 | 70.0 | −237.2 |
| H+ | 0.0 | 0.0 | 0.0 |
| OH− | −230.0 | −10.8 | −157.3 |
| H2CO3 | −699.7 | 187.0 | −623.2 |
| HCO3− | −692.0 | 91.2 | −586.8 |
| CO32− | −677.1 | −56.9 | −527.9 |
| HCl | −167.2 | 56.5 | −131.3 |
| Cl− | −167.2 | 56.5 | −131.3 |
| NaCl (*aq*) | −407.3 | 115.5 | −393.2 |
| NaOH | −470.1 | 48.1 | −419.2 |
| Na+ | −240.1 | 59.0 | −261.9 |
| NaHCO3 (*aq*) | −945.5 | 100.0 | −847.3 |
| NaCO3− | −937.6 | −41.9 | −797.0 |
| Na2CO3 (*aq*) |  |  | −1051.6 |
| HNO3 | −207.3 | 146.0 | −111.3 |
| NO3− | −207.3 | 146.4 | −111.3 |
| UO22+ | −1019.0 | −98.2 | −952.6 |
| UO2OH+ | −1261.4 | 17.0 | −1159.7 |
| UO2(OH)2 (*aq*) |  |  | −1357.5 |
| UO2(OH)3− |  |  | −1546.6 |
| UO2(OH)42− |  |  | −1716.2 |
| (UO2)2OH3+ |  |  | −2126.8 |
| (UO2)2(OH)22+ | −2572.1 | −38.0 | −2347.3 |
| (UO2)3(OH)42+ |  |  | −3738.3 |
| (UO2)3(OH)5+ | −4389.1 | 83.0 | −3954.6 |
| (UO2)3(OH)7− |  |  | −4333.8 |
| (UO2)4(OH)7+ |  |  | −5345.2 |
| UO2CO3 (*aq*) | −1689.2 | 58.9 | −1537.2 |
| UO2(CO3)22− | −2351.0 | 181.8 | −2103.2 |
| UO2(CO3)34− | −3083.9 | 38.4 | −2660.9 |
| UO2Cl+ |  |  | −1084.8 |
| UO2Cl2 (*aq*) |  |  | −1208.9 |
| UO2Cl3− |  |  | −1331.6 |
| UO2NO3+ |  |  | −1065.6 |

Table S2. Summary of the aqueous reactions occurring in laboratory studies and considered in the adsorption model.S1,S11,S13

| **Aqueous Reaction** |
| --- |
| H2O (*l*) = H+ + OH− |
| H2CO3 = H+ + HCO3− |
| HCO3− = H+ + CO32− |
| NaHCO3 (*aq*) = H+ + CO32− + Na+ |
| NaCO3− = CO32− + Na+ |
| Na2CO3 (*aq*) = CO32− + 2Na+ |
| NaOH = OH− + Na+ |
| NaCl (*aq*) = Cl− + Na+ |
| HCl = Cl− + H+ |
| HNO3 = H+ + NO3− |
| NO3− + UO22+ = UO2NO3+ |
| 2NO3− + UO22+ = UO2(NO3)2 (*aq*) |
| H2O (*l*) + UO22+ = H+ + UO2OH+ |
| 2H2O (*l*) + UO22+ = 2H+ + UO2(OH)2 (*aq*) |
| 3H2O (*l*) + UO22+ = 3H+ + UO2(OH)3− |
| 4H2O (*l*) + UO22+ = 4H+ + UO2(OH)42− |
| H2O (*l*) + 2UO22+ = H+ + (UO2)2OH3+ |
| 2H2O (*l*) + 2UO22+ = 2H+ + (UO2)2(OH)22+ |
| 4H2O (*l*) + 3UO22+ = 4H+ + (UO2)3(OH)42+ |
| 5H2O (*l*) + 3UO22+ = 5H+ + (UO2)3(OH)5+ |
| 7H2O (*l*) + 3UO22+ = 7H+ + (UO2)3(OH)7− |
| 7H2O (*l*) + 4UO22+ = 7H+ + (UO2)4(OH)7+ |
| CO32− + UO22+ = UO2CO3 (*aq*) |
| 2CO32− + UO22+ = UO2(CO3)22− |
| 3CO32− + UO22+ = UO2(CO3)34− |
| Cl− + UO22+ = UO2Cl+ |
| 2Cl− + UO22+ = UO2Cl2 (*aq*) |
| 3Cl− + UO22+ = UO2Cl3− |

*Numerical Techniques*

Collectively, each component and/or chemistry module of the model framework combines to form a fully coupled, non-linear system of equations. The primary unknowns in the system are the concentrations of the aqueous and adsorbed species, all of which must be solved simultaneously. Typically, the best approaches to solve these types of problems are gradient search or Newton methods. For the model developed in this work, we utilized a Jacobian-Free Newton methodS14 coupled with a backtracking line search algorithmS15 for efficiency and stability.

*Adsorption Modeling Software*

All of the model results and simulations were performed using software developed specifically for aqueous phase adsorption. That software is a module (called SHARK) of a larger programming project known as Ecosystem. Ecosystem is an open-source set of modeling tools for aqueous and gaseous physical/chemical processes developed by Dr. Austin Ladshaw as part of his PhD in Environmental Engineering. The software was developed entirely in C/C++ and has no external dependencies. Visit https://bitbucket.org/gitecosystem/ecosystem to download and/or view the source code.

*Comparisons between Different AO/IDO Ratios and Data*


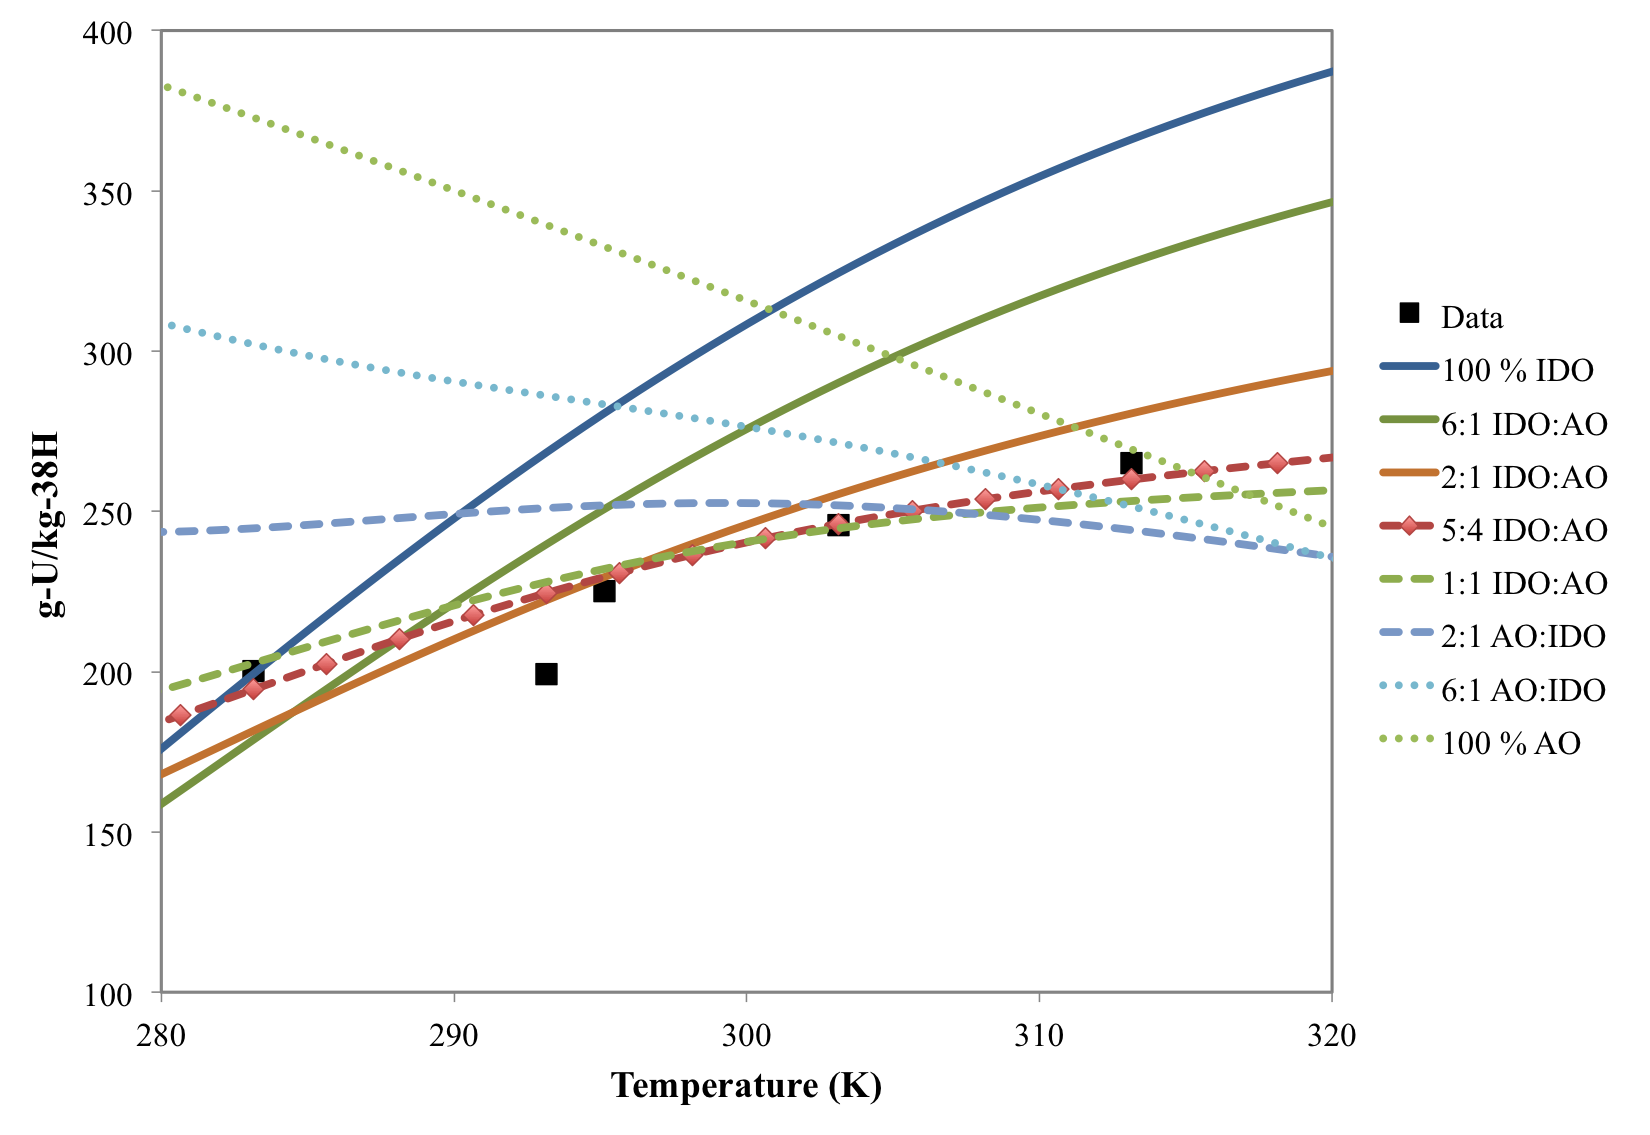


Figure S1. Simulation result comparisons between 38H adsorption data and 38H model results at various IDO:AO ratios. The ratio that best described the data was a 5:4 IDO to AO ratio.


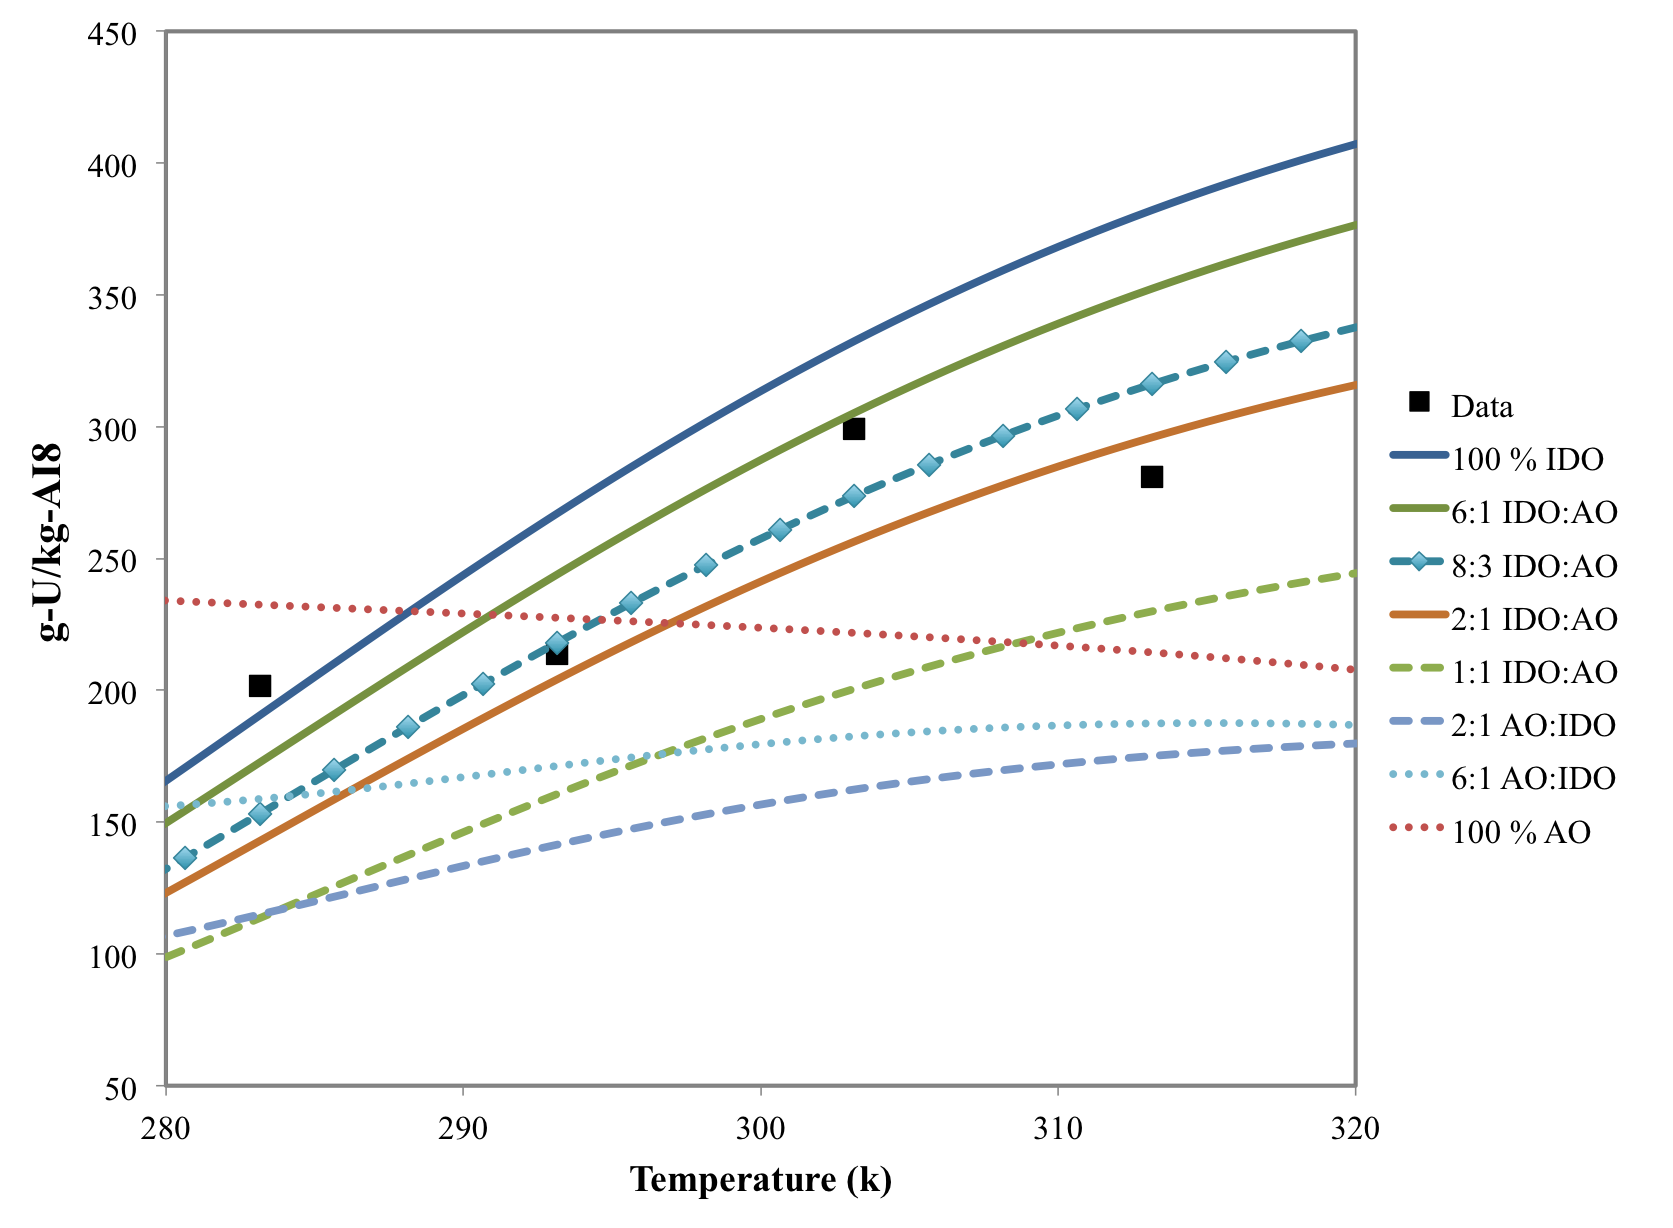


Figure S2. Simulation result comparisons between AI8 adsorption data and AI8 model results at various IDO:AO ratios. The ratio that best described the data was an 8:3 IDO to AO ratio.

**References**

[S1] Benjamin, M.M. *Water Chemistry*, 1st ed.; Waveland Press Inc.: Long Grove, IL, USA, 2010; Ch. 1, pp. 18–51, ISBN 978-1-57766-667-7.

[S2] Yiacoumi, S.; Tien, C. *Kinetics of Metal Ion Adsorption from Aqueous Solutions*, Kluwer Academic Publishers: Boston, MA, USA, 1995; ISBN 978-1-4615-2319-2.

[S3] Abrams, D.S.; Prausnitz, J.M. Statistical thermodynamics of liquid mixtures: A new expression for the excess Gibbs energy of partly or completely miscible systems. *AIChE J*. **1975**, *21*, 116–128.

[S4] Kalinin, V.V.; Radke, C.J. An ion-binding model for ionic surfactant adsorption at aqueous-fluid interfaces. *Colloids Surf.* **1996**, *114*, 337–350.

[S5] Grahame, D.C. The Electric Double Layer and the Theory of Electrocapillarity. *Chem. Rev.* **1947**, *41*, 441 – 500.

[S6] Tien, C. *Adsorption Calculations and Modeling*, Butterworth-Heinemann: Boston, MA, USA, 1994; Ch. 3, pp. 32–41, ISBN 978-0-7506-9121-5.

[S7] Cochran, T.W.; Kabel, R.L.; Danner, R.P. Vacancy solution theory of adsorption using Flory-Huggins activity coefficient equations. *AIChE J.* **1985**, *31*, 268–277.

[S8] Talu, O.; Zwiebel, I. Multicompoentn Adsorption Equilibria of Nonideal Mixtures. *AIChE J.* **1986**, *32*, 1263–1276.

[S9] Bondi, A. Van der Waals Volumes and Radii. *J. Phys. Chem.* **1964**, *68*, 441–451.

[S10] Hemingway, B.S. Thermodynamic properties of selected uranium compounds and aqueous species at 298.15 K and 1 bar and at higher temperatures. Report No. 82-619, U.S. Geological Survey: Riston, VA, USA, 1982.

[S11] Guillamont, R.; Fangänel, T.; Neck, V.; Fuger, J.; Palmer, D. A.; Grenthe, I.; Rand, M. *Update on the Chemical Thermodynamics of Uranium, Neptunium, Plutonium, Americium and Technetium*; OECD Nuclear Energy Agency, Data Bank: Issy-les-Moulineaux, France, 2003.

[S12] Endrizzi, F.; Leggett, C.J.; Rao, L. Scientific Basis for the Efficient Extraction of Uranium from Seawater I: Understanding the Chemical Speciation of Uranium in Seawater Conditions. *Ind. Eng. Chem. Res*. **2016**, *55*, 4249–4256.

[S13] Wanty, R.B.; Goldhaber, M.B. Thermodynamics and kinetics of reactions involving vanadium in natural systems: Accumulation of vanadium in sedimentary rocks. *Geochimica et Cosmochimica Acta* **1992**, *56*, 1471–1483.

[S14] Knoll, D.A.; Keyes, D.E. Jacobian-Free Newton-Krylov Methods: a Survey of Approaches and Applications. *J. Comp. Phys.*, **2004**, *193*, 357–397.

[S15] Dennis, J.E.; Schnabel, R.B. *Numerical Methods for Unconstrained Optimization and Nonlinear Equations*; Prentice-Hall: Englewood Cliffs, NJ, 1983; Chapter 6, pp. 116–129, ISBN 978-0-89871-364-0

© 2017 by the authors. Submitted for possible open access publication under the
terms and conditions of the Creative Commons Attribution (CC BY) license (http://creativecommons.org/licenses/by/4.0/).
